# Supplementary material for: Pseurotin A Inhibits Osteoclastogenesis and Prevents Ovariectomized-Induced Bone Loss by Suppressing Reactive Oxygen Species
Source: PubMed Central journal article supplement — Theranostics. 2019 Feb 28;9(6):1634–50. doi: 10.7150/thno.30206 (PMC6485188; doi:10.7150/thno.30206), 2019-02-28
Supplement: thnov09p1634s1.pdf [file thnov09p1634s1.pdf]

**Pseurotin A inhibits osteoclastogenesis and prevents ovariectomized-induced bone loss by suppressing reactive oxygen species.**

Kai Chen<sup>1, #</sup>, Pengcheng Qiu<sup>2, 3, #</sup>, Yu Yuan<sup>1, 4</sup>, Lin Zheng<sup>2, 3</sup>, Jianbo He<sup>1, 5</sup>, Chao Wang<sup>1</sup>, Qiang Guo<sup>1, 6</sup>, Jacob Kenny<sup>1</sup>, Qian Liu<sup>7, 8, 9</sup>, Jingmin Zhao<sup>7, 8, 9</sup>, Junhao Chen<sup>1</sup>, Jennifer Tickner<sup>1</sup>, Shunwu Fan<sup>2, 3</sup>, Xianfeng Lin<sup>2, 3, \*</sup>, Jiake Xu<sup>1, \*</sup>

1 School of Biomedical Sciences, University of Western Australia, Perth, WA 6009, Australia.

2 Department of Orthopedic Surgery, Sir Run Run Shaw Hospital, Medical College of Zhejiang University, Hangzhou, Zhejiang 310000, China

3 Key Laboratory of Musculoskeletal System Degeneration and Regeneration Translational Research of Zhejiang Province, Hangzhou, Zhejiang 310000, China

4 School of Physical Education and Sports Science, South China Normal University, Guangzhou, Guangdong 510631, China

5 Guangzhou University of Chinese Medicine, Guangzhou, Guangdong 510000, China

6 Department of Spine Surgery, Xiangya Hospital, Central South University, Changsha, Hunan 410008, China

7 Research Centre for Regenerative Medicine, Guangxi Medical University, Nanning, Guangxi 530021, China

8 Guangxi Key Laboratory of Regenerative Medicine, Guangxi Medical University, Nanning, Guangxi 530021, China

9 International Joint Laboratory on Regeneration of Bone and Soft Tissues, Guangxi Medical University, Nanning, Guangxi 530021, China

#Co-first authors: Kai Chen and Pengcheng Qiu contributed equally to this work.

\*Corresponding authors: 1. Jiake Xu  
Email: [jiake.xu@uwa.edu.au](mailto:jiake.xu@uwa.edu.au);

2. Xianfeng Lin  
Email: [xianfeng\\_lin@zju.edu.cn](mailto:xianfeng_lin@zju.edu.cn);

## Supplementary Results

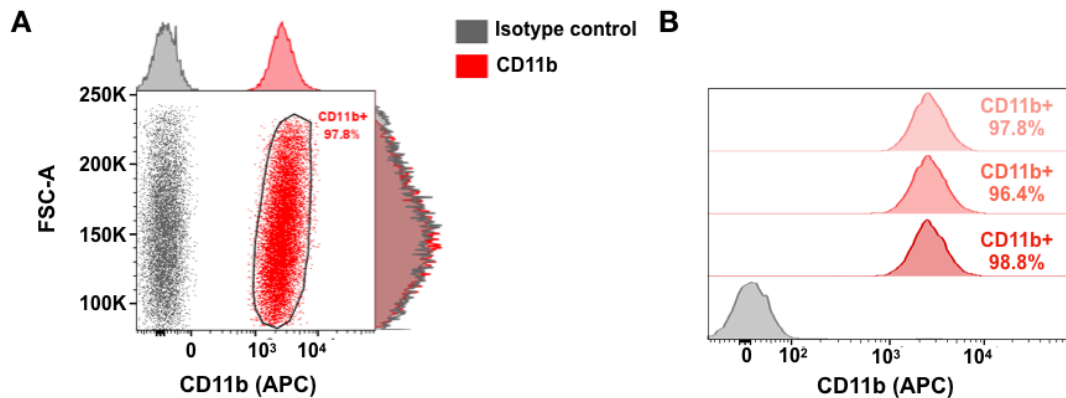

**Figure S1. Flow cytometric analysis for bone marrow-derived macrophages. (A)** CD11b expression in isotype control stained cells (grey) and APC conjugated CD11b stained cells (red) within single cell population. **(B)** The percentage of CD11b+ cells were determined in triplicate.

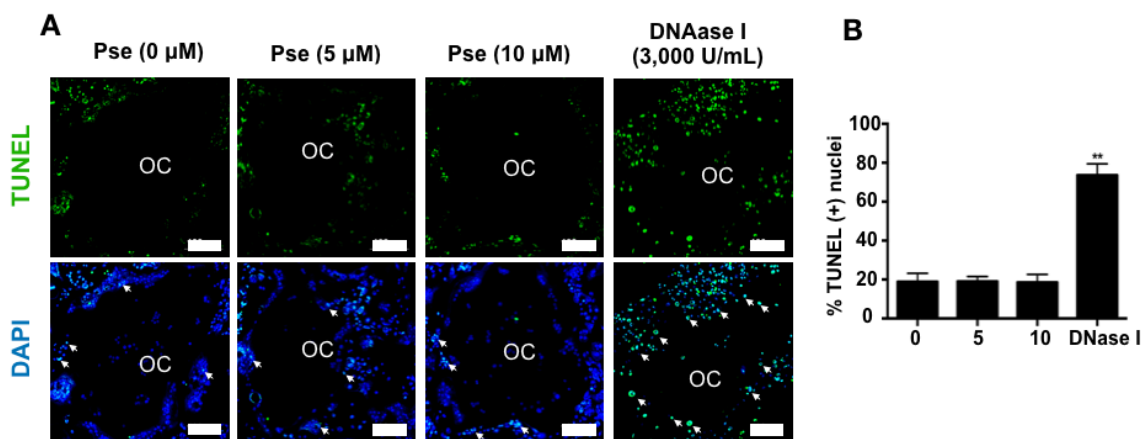

**Figure S2. Pse showed no effect on osteoclast apoptosis. (A)** After mature osteoclasts induced by RANKL, different concentrations of Pse (0, 5, 10  $\mu$ M) were used to treat the cells for additional 2 days. As a positive control for apoptosis, DNase I treatment (3,000 U/mL, 30 min) was included. Apoptotic osteoclasts were then assessed by TUNEL assay (green). Nuclei were visualized by DAPI staining. The TUNEL-positive apoptotic nuclei are indicated by white arrows. **(B)** The quantification of the percentage of TUNEL-positive nuclei in each group (n=5 per group). All bar graphs are presented as mean  $\pm$  SD. \*\*p<0.01 compared with the group without Pse and DNase I treatment. Scale bar=100  $\mu$ m. DAPI, 4,6-diamidino-2-phenylindole; Pse, Pseurotin A; TUNEL, terminal deoxynucleotidyl transferase dUTP nick end labelling; OC, osteoclast

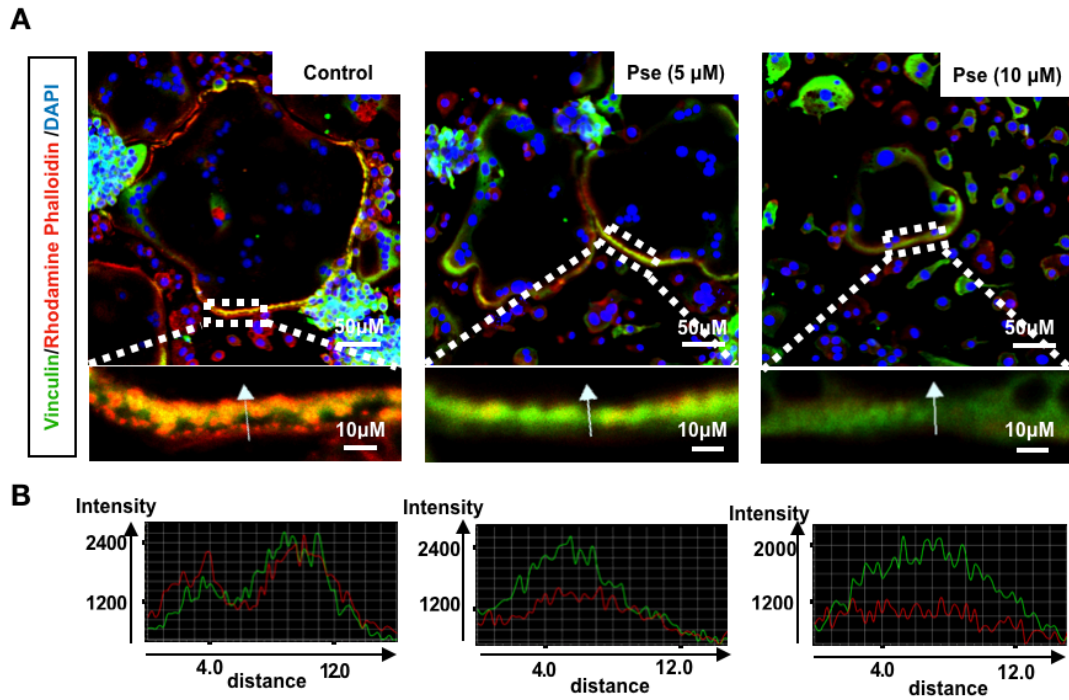

**Figure S3. Confocal images of podosome belts of osteoclasts. (A)** High magnification confocal images showing podosome belts formation in osteoclasts treated with or without Pse. **(B)** Fluorescence intensity profile through podosome belts (indicated by the white arrow in A). DAPI, 4,6-diamidino-2-phenylindole; Pse, Pseurotin A

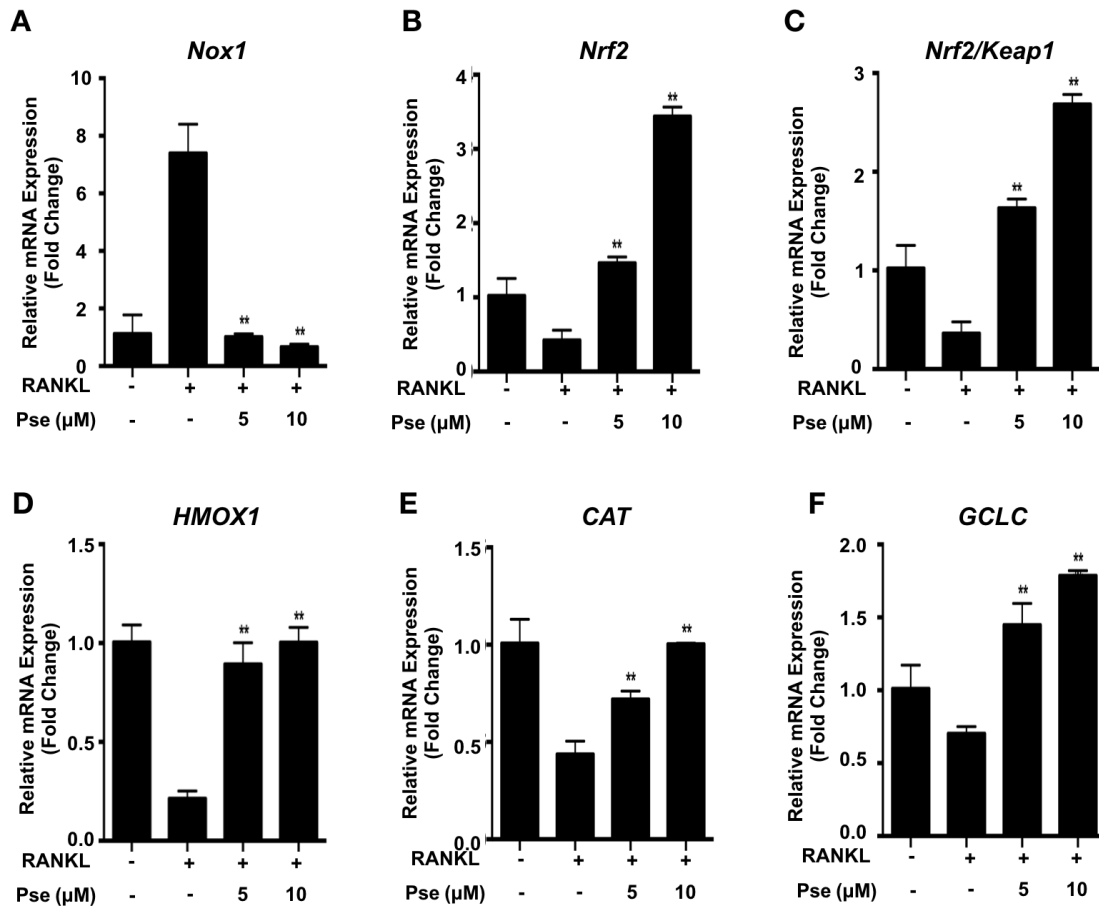

**Figure S4. ROS-related genes expression in RANKL-stimulated BMMs.** The expressions of *Nox1* (A), *Nrf2* (B), *Nrf2/Keap1* (C), *HMOX1* (D), *CAT* (E), and *GCLC* (F) were examined by qPCR after 2-day RANKL stimulation in the absence or presence of Pse (5, 10 μM). Gene expression was calibrated using the *Hprt1* housekeeping gene. \*\* $p < 0.01$  compared with the group with only RANKL treatment. *CAT*, catalase; *GCLC*, gamma-glutamylcysteine synthetase; *HMOX1*, heme oxygenase 1; *Hprt1*, hypoxanthine phosphoribosyltransferase 1; *Keap1*, kelch like ech associated protein 1; *Nox1*, nicotinamide adenine dinucleotide phosphate oxidase 1; *Nrf2*, nuclear factor- erythroid 2 related factor 2; Pse, Pseurotin A; RANKL, receptor activator of nuclear factor- $\kappa$ B (NF- $\kappa$ B) ligand

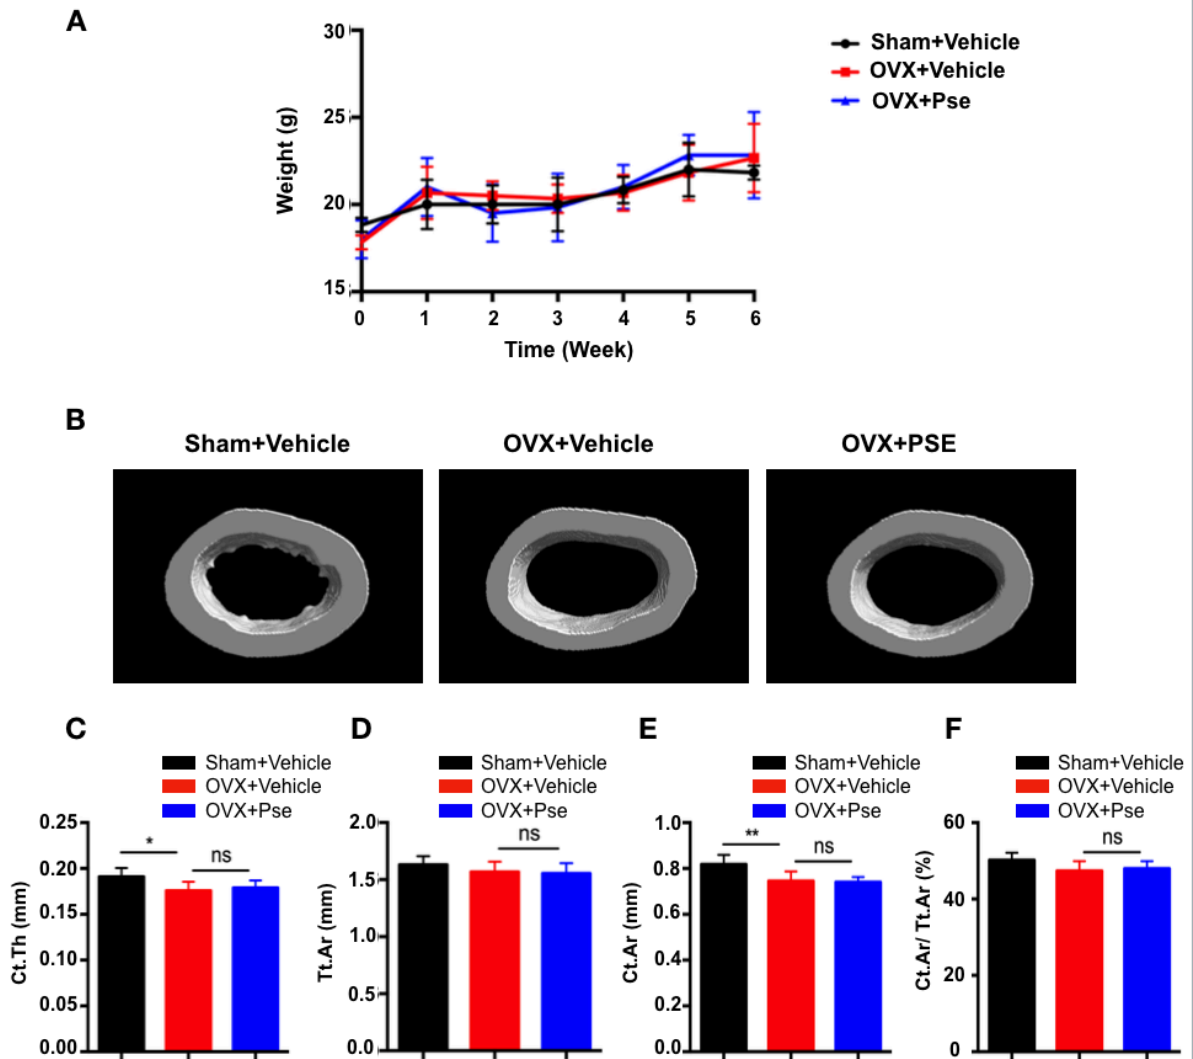

**Figure S5. Body weights and cortical bone parameters of all mice in each group. (A)** Body weights of all mice recorded at indicated time points. **(B)** Representative  $\mu$ CT images of femur cortical bone in each group. **(C-F)** Quantitative analyses of cortical bone related parameters, including cortical thickness (Ct.Th), total cross-sectional area (Tt.Ar), cortical bone area (Ct.Ar), and cortical area fraction (Ct.Ar/Tt.Ar) (N=6 per group). All bar graphs are presented as mean  $\pm$  SD. \*P<0.05, \*\*P<0.01 relative to the OVX group. OVX, ovariectomized; Pse, Pseurotin A; ns, non-significant.

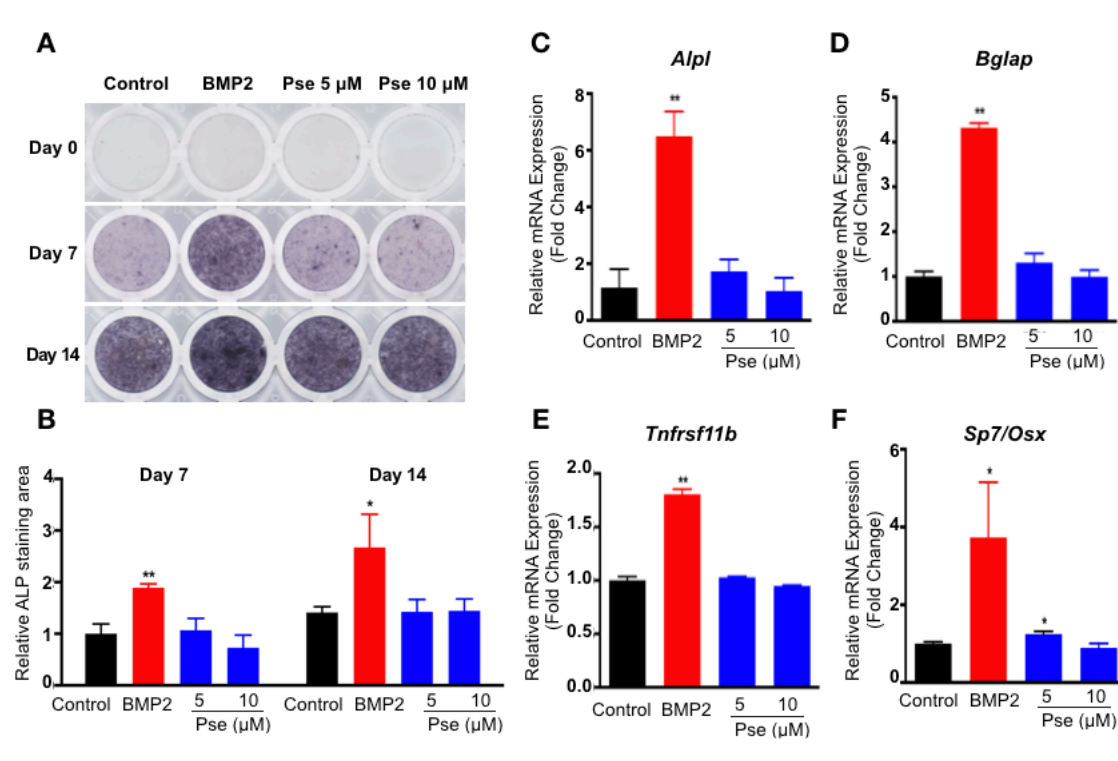

**Figure S6. Pse has no effect on osteoblast differentiation.** (A) MC3T3-E1 cells were induced osteogenic differentiation for 0, 7, and 14 days. ALP staining was carried out using BCIP/NBT liquid substrate system. (B) Quantitative analyses of ALP staining area (n=3 per group). (C-F) qPCR analysis of osteoblast genes expression of *Alpl*, *Bglap*, *Tnfrsf11b*, and *Sp7/Osx* relative to *Actb* in MC3T3-E1 cells induced in osteogenic medium for 14 days in each group (n=3 per group). All bar graphs are presented as mean ± SD. \*p<0.05 \*\*p<0.01 compared with control. *Actb*, actin beta; *Alpl*, alkaline phosphatase; *Bglap*, bone gamma-carboxyglutamate protein (osteocalcin); BMP2, bone morphogenetic protein 2; *Sp7/Osx*, sp7 transcription factor; *Tnfrsf11b*, tumor necrosis factor receptor superfamily member 11b

## Supplementary Methods

### Flow cytometric analysis for macrophage marker.

Bone marrow was flushed from the long bone (femur and tibia) of mice and then cultured in complete  $\alpha$ MEM for 24h. Non-adherent cells were then collected and cultured in complete  $\alpha$ MEM containing M-CSF (50 ng/mL) for 3 days culture. The attached cells were used for flow cytometric analysis. To investigate the purity of bone marrow macrophages (BMMs), cell suspension ( $5 \times 10^5$  cells) were incubated with APC conjugated monoclonal antibody for mouse CD11b (Thermo Fisher Scientific, Scoresby, VIC, Australia) or isotype-matched control IgGs for 30 min on ice. After washing 3 times, cells were subjected to flow cytometric analysis using FACSCantoII (BD Biosciences, New Jersey, USA). Data were processed using FlowJo software (FlowJo LLC, Ashland, Oregon, USA).

### TUNEL assay

TUNEL assays were performed using an In Situ Cell Death Detection kit (Sigma-Aldrich, Sydney, NSW, Australia).  $6 \times 10^3$  BMMs were seeded onto coverslips in 96-well plates and were induced into osteoclasts. To determine whether Pse can induce osteoclast apoptosis,

cells were cultured with M-CSF and RANKL for further 2 days after mature osteoclasts formation. Cells were treated with different concentrations of Pse (0, 5, 10  $\mu$ M). DNase I (3,000 U/mL, 30 min) treated cells were used as positive control. Cells were fixed with 4% formaldehyde and permeabilized with 0.1% Triton X-100 for 15 minutes. Cells were then processed following the manufacturer's protocol in order to label fragmented DNA. Nuclei were stained with DAPI. The percentage of nuclei was used to evaluate Pse's effect on apoptosis.

### Osteoblast differentiation

To determine whether Pse has effects on osteoblast, MC3T3-E1 cells (ATCC, Manassas, Virginia, USA) were cultured with  $\alpha$ -MEM, 10% FBS, and 1% penicillin-streptomycin at 37°C in a humidified atmosphere of 5% CO<sub>2</sub>. To induce osteogenic differentiation, cells ( $1.0 \times 10^4$ /well) were seeded in 48-well plates overnight and then changed into osteogenic medium (10 mM  $\beta$ -glycerophosphate and 50  $\mu$ g/mL ascorbic acid) with different concentrations of Pse (5, 10  $\mu$ M). BMP-2 (50 ng/mL) treatment was used as positive control; Group without Pse and BMP-2 was negative control. Medium was changed every 3 days. After incubation for 0, 7, and 14 days, cells in each group were fixed in 4% paraformaldehyde for 10 min, washed with PBS for 3 times, and stained by BCIP/NBT liquid substrate system (Sigma-Aldrich, Sydney, NSW, Australia) for alkaline phosphatase (ALP) at 37°C for 30 min.

**Supplementary Table 1. Primers Sequences**

| Gene             | Forward (5'-3')        | Reverse (5'-3')        |
|------------------|------------------------|------------------------|
| <i>Alpl</i>      | CAGGCCGCCTTCATAAGCA    | AATTGACGTTCCGATCCTGC   |
| <i>Bglap</i>     | GCGCTCTGTCTCTCTGACCT   | ACCTTATTGCCCTCCTGCTT   |
| <i>Tnfrsf11b</i> | GCCACGCAAAAGTGTGGAAT   | TTTGGTCCCAGGCAAACCTGT  |
| <i>Sp7/Osx</i>   | GTCCTCTCTGCTTGAGGAAGAA | GGGCTGAAAGGTCAGCGTAT   |
| <i>Actb</i>      | CACCCGCGAGCACAGCTTCTT  | CCACCATCACACCCTGGTGCCT |
| <i>Nox1</i>      | AAGTTTCTCTCCCGAAGGACC  | CCAACCAGGAAACCAGAAACAA |
| <i>Nrf2</i>      | TCTCCTCGCTGGAAAAAGAA   | AATGTGCTGGCTGTGCTTTA   |
| <i>CAT</i>       | CTCGCAGAGACCTGATGTCC   | GACCCCGCGGTCATGATATT   |
| <i>HMOX1</i>     | GAGCAGAACCAGCCTGAACT   | AAATCCTGGGGCATGCTGTC   |
| <i>Keap1</i>     | TGCCCTGTGGTCAAAGTG     | GGTTCGGTTACCGTCCTGC    |
| <i>GCLC</i>      | GGGGTGACGAGGTGGAGTA    | GTTGGGGTTTGTCTCTCCC    |
